# Supplementary material for: Sclerostin antibody corrects periodontal disease in type 2 diabetic mice
Source: PubMed Central journal article supplement (PMC11343605; doi:10.1172/jci.insight.181940), 2024-07-18
Supplement: jciinsight-9-181940-s128.pdf [file jciinsight-9-181940-s128.pdf]

## Sclerostin antibody corrects periodontal disease in type 2 diabetic mice

Hakan Turkkahraman<sup>1</sup>, Shannan Flanagan<sup>2</sup>, Tianli Zhu<sup>3</sup>, Nisreen Akel<sup>4</sup>, Silvia Marino<sup>4</sup>, Dayane Ortega-Gonzalez<sup>2</sup>, Xue Yuan<sup>2,5</sup>, Teresita M. Bellido<sup>4,6</sup>

<sup>1</sup> Indiana University School of Dentistry, Department of Orthodontics and Oral Facial Genetics, Indianapolis, IN, USA.

<sup>2</sup> Department of Otolaryngology-Head & Neck Surgery, School of Medicine, Indiana University, Indianapolis, IN, USA.

<sup>3</sup> Department of Biomedical Sciences and Comprehensive Care, Indiana University, School of Dentistry, Indianapolis, IN, USA.

<sup>4</sup> Department of Physiology and Cell Biology, University of Arkansas for Medical Sciences, Little Rock, AR, USA.

<sup>5</sup> Indiana Center for Musculoskeletal Health, School of Medicine, Indiana University, Indianapolis, IN, USA.

<sup>6</sup> Central Arkansas Veterans Healthcare System, John L. McClellan Little Rock, AR, USA.

### **Corresponding authors:**

Xue Yuan, PhD, 1160 West Michigan Street, GK305, Indianapolis, IN, 46202. Telephone number: 317-274-4921. Email: yuanxue@iu.edu

Teresita Bellido, PhD, West Markham Street, Slot 505, Little Rock, AR, 72205. Telephone number: 317-645-8897. E-mail: TMBellido@uams.edu

## Supplemental Figures and Figure Legends

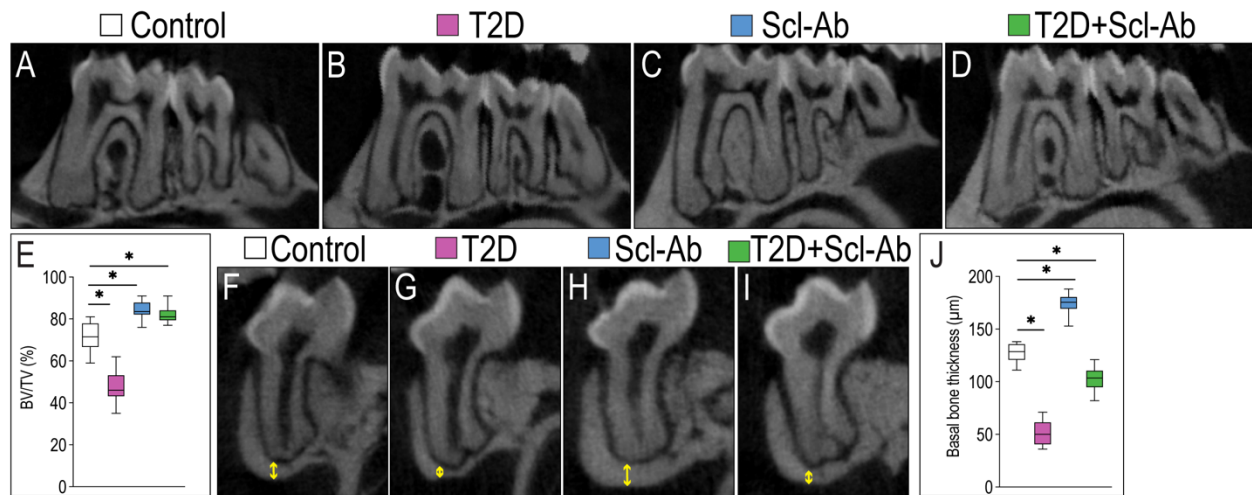

Supplemental Figure 1. Scl-Ab treatment reverses T2D-induced alveolar bone loss.

(A-D) Representative 2-dimensional (2D)  $\mu$ CT sagittal sections through the alveolar bone around mandibular first molars. (E) Quantification of bone volume over tissue volume (BV/TV) (n = 8).  $P < 0.05$ . (F-I) Representative 2D  $\mu$ CT coronal sections through the alveolar bone around maxillary first molars. Arrows indicate the thickness of the basal bone. (J) Quantification of the thickness of the basal bone (n = 8).  $P < 0.01$ .



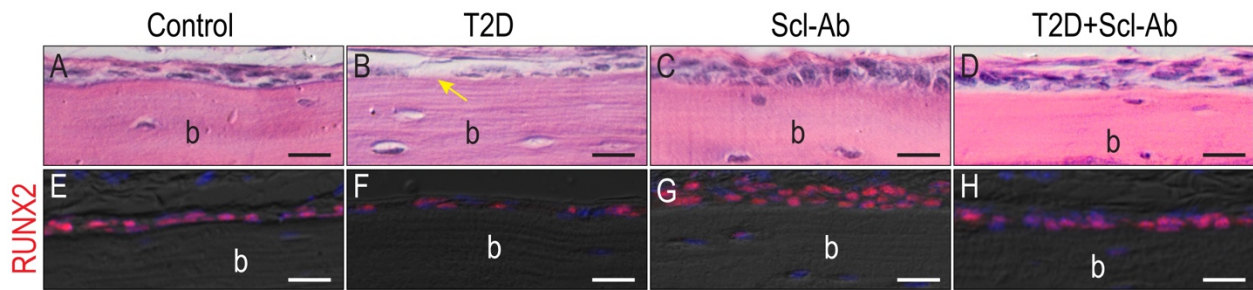

Supplemental Figure 2. Scl-Ab promotes osteoprogenitor formation on the maxillary edentulous periosteal bone surface.

(A-D) H&E staining shows the edentulous maxillary periosteal bone surface. The arrow indicates the bone surface that is not covered by cells. (E-H) Immunostaining of RUNX2.

Abbreviation: b, bone. Scale bars: 25  $\mu$ m.

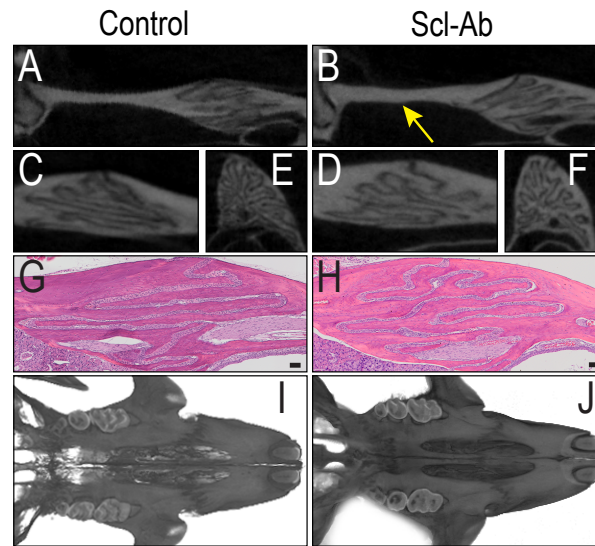

Supplemental Figure 3. Scl-Ab treatment alters the edentulous ridge but not the premaxillary suture.

(A, B) Representative sagittal 2D micro-CT sections of the maxillary molar 1 to premaxillary suture area. The arrow indicates the enlarged edentulous ridge in the Scl-Ab group. (C, D) Enlarged premaxillary suture areas in the Scl-Ab group compared with the control group. (E, F) Representative coronal 2D micro-CT sections of the premaxillary suture. (G, H) Representative H&E-stained histological sagittal sections through the premaxillary suture. (I, J) Representative 3D micro-CT reconstruction images of the skull. Scale bars: 50  $\mu$ m.

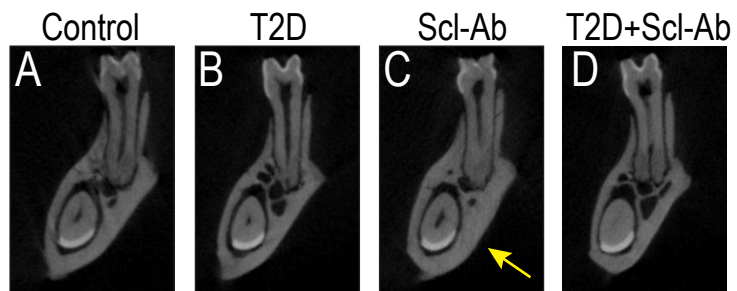

Supplemental Figure 4. Scl-Ab treatment slightly enlarges the mandible.

(A-D) Representative coronal 2D micro-CT sections of mandibles. The arrow indicates increased thickness.

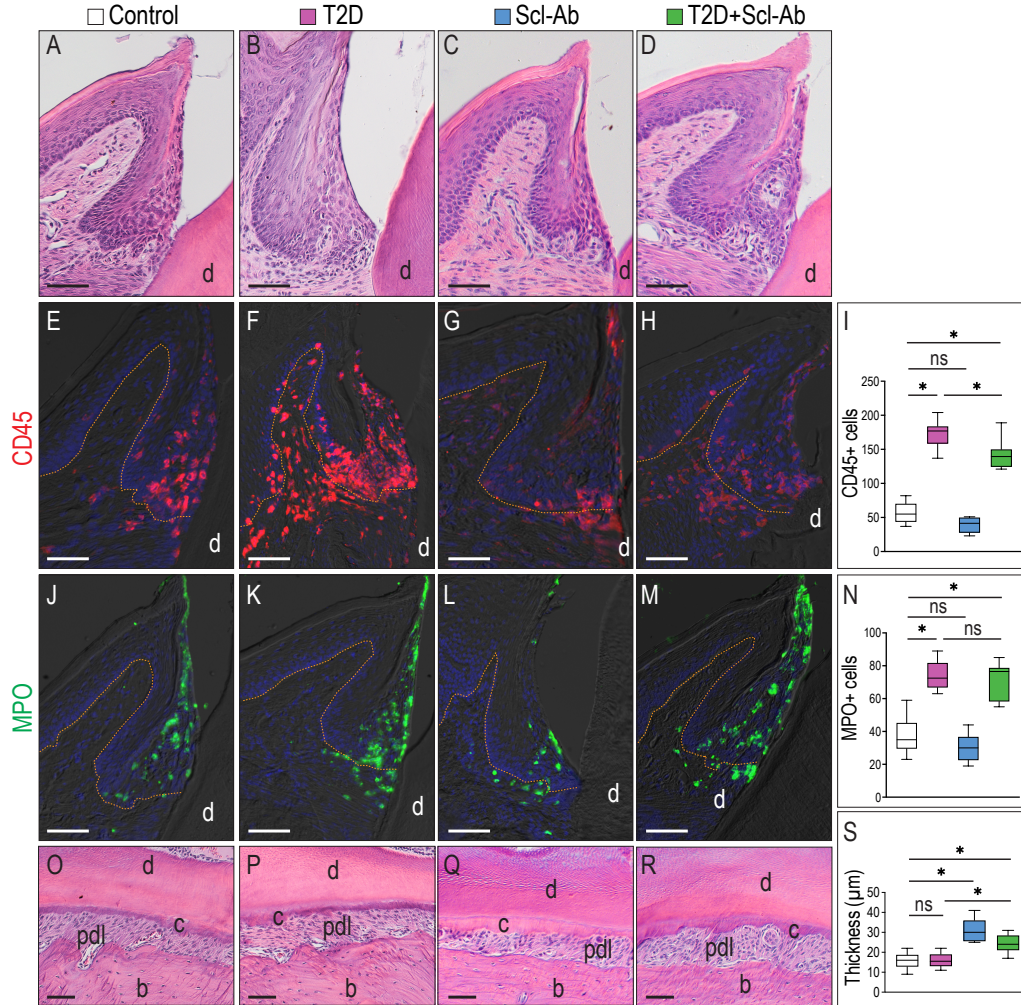

Supplemental Figure 5. Gingival inflammation and cementum thickness change after Scl-Ab treatment.

(A-D) H&E staining shows the gingiva of the first maxillary molar. (E-H) Immunostaining of CD45. (I) Quantification of CD45+ cells. (J-M) Immunostaining of the neutrophil marker myeloperoxidase (MPO).  $P < 0.01$ . (N) Quantification of MPO+ cells.  $P < 0.0001$ . (O-R) H&E staining shows cementum in the furcation area. (S) Quantification of cementum in the furcation area ( $n = 8$ ).  $P < 0.01$ ; ns, not significant. d, dentin; c, cementum; pdl, periodontal ligament; b, bone. Scale bars: 50  $\mu\text{m}$ .
